# Supplementary material for: SLC1A5 provides glutamine and asparagine necessary for bone development in mice
Source: eLife journal article supplement (doi:10.7554/elife.71595), 2021-10-14
Supplement: fig1-figsupp1-data1 [file Figure 1 figure supplement 1G-H.xlsx]

## Sheet: Sheet1
Tibia	Alizarin Red					Alcian blue
Sp7Slc1a5f/+	0	0.165	0	0		1.14	1.18938	1.2	1.28125
Sp7Slc1a5f/f	0	0	0	0	0	1.18125	1	1.10625	1.0125	0.93125
Femur	Alizarin Red					Alcian blue
Sp7Slc1a5f/+	0.15625	0	0	0.10625		1.19375	1.30313	1.33	1.21875
Sp7Slc1a5f/f	0.075	0	0	0	0	1.175	1.25	1.2125	1.25	1.13125
