# Supplementary material for: SLC1A5 provides glutamine and asparagine necessary for bone development in mice
Source: eLife journal article supplement (doi:10.7554/elife.71595), 2021-10-14
Supplement: fig1-figsupp1-data1 [file Figure 1 figure supplement 1K-L.xlsx]

## Sheet: Sheet1
Tibia	Alizarin Red								Alcian blue
Sp7Slc1a5f/+	0.312	0.334	0.622	0.736	0.3	0.631	0.604		0.901	0.839	0.843	1.017	0.92	0.939	0.858
Sp7Slc1a5f/f	0	0	0	0.564	0	0	0.542	0.436	1.072	0.945	1.035	1	1.038	0.989	0.877	0.789
Femur	Alizarin Red								Alcian blue
Sp7Slc1a5f/+	0.311	0.289	0.436	0.52	0.29	0.527	0.552		1.139	0.937	1.15	1.21	1.06	0.841	0.88
Sp7Slc1a5f/f	0	0	0.219	0.445	0	0	0.434	0.329	1.24	1.176	0.816	1.111	1.058	1.22	0.916	0.951
