# Supplementary material for: SLC1A5 provides glutamine and asparagine necessary for bone development in mice
Source: eLife journal article supplement (doi:10.7554/elife.71595), 2021-10-14
Supplement: fig1-figsupp1-data1 [file Figure 1 figure supplement 1O-P.xlsx]

## Sheet: Sheet1
Tibia	Alizarin Red					Alcian blue
Sp7Slc1a5f/+	1.52	1.41	1.3			1.64	1.58	1.75
Sp7Slc1a5f/f	1.45	1.29	1.4	0.88		1.55	1.49	1.56	1.06
Femur	Alizarin Red					Alcian blue
Sp7Slc1a5f/+	1.12	1.09	1.2			1.81	1.88	1.75
Sp7Slc1a5f/f	1.13	0.9	0.98	0.6		1.6	1.78	1.82	1.2
