# Supplementary material for: SLC1A5 provides glutamine and asparagine necessary for bone development in mice
Source: eLife journal article supplement (doi:10.7554/elife.71595), 2021-10-14
Supplement: fig1-figsupp1-data1 [file Figure 1 figure supplement 1U-X.xlsx]

## Sheet: Sheet1
Humerus	Alizarin Red			Alcian blue
Sp7Slc1a5f/+	2.46	2.78	2.79	1.38	1.53	1.58
Sp7Slc1a5f/f	2.64	2.29	2.71	1.4	1.57	1.54
Femur	Alizarin Red			Alcian blue
Sp7Slc1a5f/+	1.98	2.44	2.39	1.39	1.55	1.38
Sp7Slc1a5f/f	2.196	1.97	2.18	1.5	1.35	1.55
