# Supplementary material for: SLC1A5 provides glutamine and asparagine necessary for bone development in mice
Source: eLife journal article supplement (doi:10.7554/elife.71595), 2021-10-14
Supplement: fig2-figsupp1-data1 [file Figure 2 figure supplement 1X.xlsx]

## Sheet: Sheet1
	Veh				GPNA
%Edu +ve cells	22.8031	23.3512	20.7344	21.0274	17.8917	15.9649	16.4354	16.8764
