# Supplementary material for: SLC1A5 provides glutamine and asparagine necessary for bone development in mice
Source: eLife journal article supplement (doi:10.7554/elife.71595), 2021-10-14
Supplement: fig2-figsupp1-data1 [file Figure 2 figure supplement 1Y.xlsx]

## Sheet: Sheet1
S35 Cys/Met Incorporation		Veh	GPNA
%		103.826	73.5744
		94.2087	74.7803
		101.966	77.7285
		100	75.3611
		5.10087	2.13704
