# Supplementary material for: SLC1A5 provides glutamine and asparagine necessary for bone development in mice
Source: eLife journal article supplement (doi:10.7554/elife.71595), 2021-10-14
Supplement: fig2-figsupp2-data1 [file Figure 2 figure supplement 2C.xlsx]

## Sheet: Sheet1
	Sp7Slc1a5f/+			Sp7Slc1a5f/f
Slc1a5	1	0.08	3	0.518	0.158	3
Akp2	1	0.3	3	0.88	0.2	3
Sp7	1.02	0.295	3	0.88	0.24	3
Col1a1	1.03	0.3	3	0.824	0.12	3
Spp1	1	0.2	3	0.51	0.19	3
Bglap	1.1	0.1	3	0.565	0.108	3
