# Supplementary material for: SLC1A5 provides glutamine and asparagine necessary for bone development in mice
Source: eLife journal article supplement (doi:10.7554/elife.71595), 2021-10-14
Supplement: fig2-figsupp2-data1 [file Figure 2 figure supplement 2N.xlsx]

## Sheet: Sheet1
	Mouse ID	Surface	(mm)	OCN+ Cells	OCN/mm	Average	Std Dev	T.test
Het	52	736.936	38.7861	278	7.16752	7.89968	1.9115	0.0130909
	54	1018.97	53.6297	540	10.069
	63	590.948	31.1025	201	6.4625
Hm	50	729.323	38.3854	173	4.50692	3.89435	0.893181
	53	874.906	46.0477	217	4.71251
	64	711.88	37.4674	104	2.77575
	67	678.91	35.7321	128	3.58221
