# Supplementary material for: SLC1A5 provides glutamine and asparagine necessary for bone development in mice
Source: eLife journal article supplement (doi:10.7554/elife.71595), 2021-10-14
Supplement: fig3-data1 [file Figure 3A.xlsx]

## Sheet: Sheet1
	Sp7Cre WT			Sp7Cre Slc1a5f/f
Proline incorp protein	105.471	98.1634	96.3656	74.9917	73.4269	77.6051
