# Supplementary material for: SLC1A5 provides glutamine and asparagine necessary for bone development in mice
Source: eLife journal article supplement (doi:10.7554/elife.71595), 2021-10-14
Supplement: fig3-figsupp1-data1 [file Figure 3 figure supplement 1A.xlsx]

## Sheet: Sheet1
	Luc			Slc1a5
PROLINE incorp	99.2655	103.732	97.0021	73.4222	79.4699	80.5597
