# Supplementary material for: SLC1A5 provides glutamine and asparagine necessary for bone development in mice
Source: eLife journal article supplement (doi:10.7554/elife.71595), 2021-10-14
Supplement: fig3-figsupp1-data1 [file Figure 3 figure supplement 1B.xlsx]

## Sheet: Sheet1
Luc			Slc1a5
99.677	103.027	97.296	65.4722	60.577	46.2146
