# Supplementary material for: SLC1A5 provides glutamine and asparagine necessary for bone development in mice
Source: eLife journal article supplement (doi:10.7554/elife.71595), 2021-10-14
Supplement: fig4-data1 [file Figure 4A.xlsx]

## Sheet: Sheet1
	sgLuc			sgSlc1a5												#DIV/0!	#DIV/0!
Gln	1.12398	0.997745	0.878275	0.308711	0.277869	0.517957											#DIV/0!
Lys	1.12419	0.997499	0.878309	0.253392	0.244708	0.431224											#DIV/0!
His	1.23248	0.947162	0.82036	0.346416	0.141043	0.401851											#DIV/0!
Asn	1.17902	0.979206	0.841771	0.284121	0.393721	0.663682											#DIV/0!
Asp	1.04718	1.04287	0.909944	0.533946	0.599838	0.693953											#DIV/0!
Ser	1.10256	0.99172	0.905716	0.596543	0.674181	0.744989											#DIV/0!
Ala	1.03632	1.00252	0.961163	0.621721	0.704169	0.769735											#DIV/0!
Gly	1.03654	1.02324	0.940224	0.631056	0.730734	0.758946											#DIV/0!
Pro	0.876577	1.10381	1.01961	0.116648	0.821235	0.733407											#DIV/0!
Cys	0.797987	1.29132	0.910691	0.791983	1.11162	0.786372											#DIV/0!
Met	0.941085	1.27232	0.786595	1.02487	0.738651	0.679037											#DIV/0!
Leu	0.932757	1.11947	0.947778	0.896217	0.950547	0.82015											#DIV/0!
Ile	0.924329	1.13041	0.945261	0.91096	0.978128	0.814431											#DIV/0!
Val	0.920726	1.12035	0.958929	0.786047	0.978267	0.81861											#DIV/0!
Thr	1.03038	1.04565	0.923977	0.531172	0.976698	0.752527											#DIV/0!
Phe	0.975193	1.13724	0.887569	0.853119	0.859815	0.709936											#DIV/0!
																	#DIV/0!
