# Supplementary material for: SLC1A5 provides glutamine and asparagine necessary for bone development in mice
Source: eLife journal article supplement (doi:10.7554/elife.71595), 2021-10-14
Supplement: fig4-data1 [file Figure 4B.xlsx]

## Sheet: Sheet1
	sgLuc									sgSlc1a5
Gln	102.672	97.9677	99.3608	103	103.957	92.6428	99.9	100.817	99.2967	39.0164	37.5777	37.437	51.2	53.3576	54.5368	61.3	36.8691	47.0973
Asn	97.863	103.331	98.8058							79.8554	78.7241	82.8724
Glu	101.223	102.383	96.3944	97.4	100.93	101.653				95.4695	84.3549	97.5858	119	112.404	130.235
Pro	106.109	98.8302	95.0613	116.17	92.4351	91.3948				100.829	105.361	105.101	90.5857	82.8025	111.123
Ala	109.658	116.532	73.81	117	99.7925	83.1159	99.819	109.854	90.3267	86.3122	93.8591	84.1869	140	111.855	100.419	92.3678	99.1345	91.1676
Lys	111.511	112.657	75.8315	114	99.4862	86.0716	95.8	98.094	106.092	110.175	123.176	117.479	121	113.501	104.77	134	123.248	114.638
Ser	95.6647	104.096	100.239							78.8228	43.3023	104.527
Asp	105.789	87.5563	106.655	108	102.565	89.7184				57.8683	53.2756	54.5407	102	88.6752	81.9223
Arg	100.035	100.16	99.8055							94.9451	87.1212	94.4433
