# Supplementary material for: SLC1A5 provides glutamine and asparagine necessary for bone development in mice
Source: eLife journal article supplement (doi:10.7554/elife.71595), 2021-10-14
Supplement: fig4-figsupp1-data1 [file Figure 4 figure supplement 1A.xlsx]

## Sheet: Sheet1
	sgLuc			sgSlc1a5
Pyruvate	0.659112	1.38288	0.958011	0.974567	1.41329	0.855686
Lactate	0.869052	1.19519	0.935756	1.04358	1.25282	0.92461
Succinate	0.904722	1.22884	0.866436	0.794767	1.14778	0.998597
Fumarate	1.2001	0.932711	0.867189	0.574553	0.236534	0.479657
Malate	1.04921	1.04917	0.901625	0.525717	0.598811	0.567724
Citrate	1.00521	1.11935	0.875444	0.610339	0.734154	0.675072
aKG	0.929904	1.11813	0.951964	0.478125	0.655637	0.588277
