# Supplementary material for: SLC1A5 provides glutamine and asparagine necessary for bone development in mice
Source: eLife journal article supplement (doi:10.7554/elife.71595), 2021-10-14
Supplement: fig4-figsupp1-data1 [file Figure 4 figure supplement 1B.xlsx]

## Sheet: Sheet1
%UPTAKE	Veh			GPNA
Gln	106.429	103.736	89.8343	27.3666	25.6711	24.8957
Asn	98.3746	100.919	100.707	76.6431	82.2615	69.9647
Ser	117.565	101.413	81.0218	101.756	97.3881	103.338
Glu	117.442	71.1064	111.452	74.2618	54.106	59.6575
Pro	110.696	106.59	82.7139	93.946	87.7881	89.463
