# Supplementary material for: SLC1A5 provides glutamine and asparagine necessary for bone development in mice
Source: eLife journal article supplement (doi:10.7554/elife.71595), 2021-10-14
Supplement: fig4-figsupp1-data1 [file Figure 4 figure supplement 1D.xlsx]

## Sheet: Sheet1
	sgLuc			sgSlc1a5			sgSlc1a5 +AA
Slc1a5	1.1016	0.878646	1.03315	0.216156	0.19909	0.170687	0.242505	0.302456	0.277815
Akp2	1.03827	0.922605	1.04394	0.771154	0.781932	0.700229	0.924189	0.868591	0.879592
Runx2	1.00493	0.897163	1.10916	0.876152	0.889223	0.89293	1.06349	0.980218	0.994461
Sp7	0.997302	0.970289	1.03341	0.896682	0.75752	0.66505	0.904326	0.96397	1.00823
Ibsp	0.859458	1.35346	0.859666	0.0920027	0.0883585	0.213241	0.714238	0.740217	0.718693
Bglap	0.893345	1.31609	0.850539	0.5629	0.640962	0.719892	0.760008	0.674818	1.06549
