# Supplementary material for: SLC1A5 provides glutamine and asparagine necessary for bone development in mice
Source: eLife journal article supplement (doi:10.7554/elife.71595), 2021-10-14
Supplement: fig4-figsupp1-data1 [file Figure 4 figure supplement 1E.xlsx]

## Sheet: Sheet1
sgRNA	Luc		Slc1a5
NEAA	-	-	+	+
	43	40.9	37.4	36.2
	40.8	39.9	36.4	34.9
	41.4	40.6	36	36.1
Average	41.7333	40.4667	36.6	35.7333
STD	1.13725	0.51316	0.72111	0.723418
