# Supplementary material for: SLC1A5 provides glutamine and asparagine necessary for bone development in mice
Source: eLife journal article supplement (doi:10.7554/elife.71595), 2021-10-14
Supplement: fig6-data1 [file Figure 6A.xlsx]

## Sheet: Sheet1
	13CU-Glutamine			13CU-Asparagine
Asn M+4	-1.85608	1.59983	-1.97071	84.4126	84.0684	87.2518
Asp M+4	15.2245	15.4161	16.5142	8.71812	9.05408	9.3665
Glu M+4	4.39419	3.00195	3.15845	0.451853	0.393896	0.423
Glu M+5	40.2922	27.9326	28.3865	0.328484	0.308272	0.329611
Pro M+4/5	5.89263	5.96102	6.04138	0.0895455	0.134823	0.115003
