# Supplementary material for: SLC1A5 provides glutamine and asparagine necessary for bone development in mice
Source: eLife journal article supplement (doi:10.7554/elife.71595), 2021-10-14
Supplement: fig6-data1 [file Figure 6B.xlsx]

## Sheet: Sheet1
	15Nα-Asparagine			14Nα-Glutamine									15Nα-Asparagine			15Nα-Glutamine
Asn	67.8465	75.9649	74.6548	3.65309	4.53956	3.86168						Asn	67.8465	75.9649	74.6548	3.65309	4.53956	3.86168
Asp	8.54394	9.89933	9.73121	25.7996	29.0895	30.1474						Asp	8.54394	9.89933	9.73121	25.7996	29.0895	30.1474
Glu	3.34756	10.2974	10.5807	31.9707	32.4674	33.48						Glu	3.34756	10.2974	10.5807	31.9707	32.4674	33.48
Pro	1.42948	1.64986	1.52471	14.9405	16.5795	16.298						Pro	1.42948	1.64986	1.52471	14.9405	16.5795	16.298
Ser	2.90235	4.09123	3.94601	10.5547	11.2366	11.6677						Ser	2.90235	4.09123	3.94601	10.5547	11.2366	11.6677
Ala	2.67144	4.39475	4.48013	24.6108	25.5295	26.2432						Ala	2.67144	4.39475	4.48013	24.6108	25.5295	26.2432
