# Supplementary material for: SLC1A5 provides glutamine and asparagine necessary for bone development in mice
Source: eLife journal article supplement (doi:10.7554/elife.71595), 2021-10-14
Supplement: fig6-data1 [file Figure 6C.xlsx]

## Sheet: Sheet1
	13CU-Asparagine			13CU-Glutamine
Glu	0.175656	0.183275	0.166201	38.2847	37.5807	38.1594
Asp	22.4149	23.457	23.7127	10.8154	10.7217	10.8133
Ala	0.415304	0.409014	0.390568	1.23841	1.29359	1.31154
Pro	0.0730951	0.0661489	0.0670086	3.29679	3.62671	3.7038
Ser	-0.117047	-0.115586	-0.0706313	0.085119	0.101435	0.002076
