# Supplementary material for: SLC1A5 provides glutamine and asparagine necessary for bone development in mice
Source: eLife journal article supplement (doi:10.7554/elife.71595), 2021-10-14
Supplement: fig6-data1 [file Figure 6D.xlsx]

## Sheet: Sheet1
	15Nα--Asparagine						15Nα-Glutamine
Glu	-1.31334	0.322933	-0.958081	2.5411	0.139527	-0.440412	36.7788	36.8929	36.8502
Asp	19.2119	19.5195	19.3453	19.5385	19.1683	19.6728	15.5179	16.2101	15.8106
Ala	4.11925	2.90412	2.04467	2.83593	3.55205	2.85559	14.9777	16.7204	15.5616
Pro	1.92529	1.48749	1.39615	1.35763	1.71648	1.60715	5.76202	6.10954	5.8884
Ser	2.844	3.24373	2.91359	3.09204	2.59607	2.52617	9.77545	10.7351	10.2751
