# Supplementary material for: SLC1A5 provides glutamine and asparagine necessary for bone development in mice
Source: eLife journal article supplement (doi:10.7554/elife.71595), 2021-10-14
Supplement: fig6-data1 [file Figure 6E.xlsx]

## Sheet: Sheet1
	DMSO			BPTES
Glu M+5	28.7824	27.0629	25.7097	7.02027	6.64333	5.80759
Asp M+4	17.2363	14.8326	14.8582	0.981216	0.654487	0.621412
Pro M+4/5	3.05979	2.94326	2.53012	0.961429	0.767056	0.371877
Ala M+3	0.84571	0.8412	0.791313	0.0233503	-0.0763566	0.0555934
Ser M+3	0.228763	0.239884	0.270473	0.0429072	-0.0139692	-0.00592554
