# Supplementary material for: SLC1A5 provides glutamine and asparagine necessary for bone development in mice
Source: eLife journal article supplement (doi:10.7554/elife.71595), 2021-10-14
Supplement: fig6-data1 [file Figure 6F.xlsx]

## Sheet: Sheet1
	DMSO			BPTES
Glu	23.6452	24.3065	22.1856	2.66899	3.72969	3.39139
Asp	22.2058	21.8594	20.4887	0.826089	1.91637	3.57086
Ala	13.8975	13.9606	13.3402	1.29337	1.57072	1.60504
Ser	7.24728	7.52877	7.17364	1.73495	1.87399	1.99816
Pro	2.42083	2.42083	2.7899	1.28965	-0.119098	1.4001
