# Supplementary material for: SLC1A5 provides glutamine and asparagine necessary for bone development in mice
Source: eLife journal article supplement (doi:10.7554/elife.71595), 2021-10-14
Supplement: fig6-data1 [file Figure 6G.xlsx]

## Sheet: Sheet1
	DMSO						BPTES
Glu	97.232	100.53	102.24	104.22	95.353	100.42	63.177	65.964	74.002	62.057	54.663	48.496
Asp	91.012	104.95	104.04	100.92	95.105	103.98	35.667	44.882	56.761	34.875	22.747	15.656
Ala	86.94	108.42	104.64	101.87	92.74	105.39	59.928	70.635	84.035	62.187	49.794	40.624
Ser	85.386	108.32	106.29	102.01	92.641	105.35	72.026	86.624	100.66	75.271	56.142	45.795
Gly	96.787	103.14	100.07	104.75	93.289	101.96	82.828	87.306	88.819	90.899	80.011	71.326
Val	84.503	83.644	131.85	98.355	90.182	111.46	101	74.878	164.24	82.364	57.301	21.843
Leu	103.79	99.836	96.375	134.17	73.06	92.769	73.742	96.99	119.27	75.05	79.923	56.312
Iso	84.73	136.02	79.245	78.875	71.378	149.75	99.745	79.522	102.67	67.847	78.386	35.528
Pro	76.79	111.53	111.68	99.756	88.627	111.62	82.702	106.87	131.65	82.403	60.543	49.096
Met	68.269	117.98	113.75	99.291	86.422	114.29	80.844	109.65	142.49	80.384	51.589	35.931
Phe	71.074	115.93	113	98.181	90.294	111.52	87.102	111.94	141.92	83.006	57.352	39.943
Thr	76.068	111.92	112.01	98.206	90.471	111.32	74.202	99.188	120.91	73.226	53.377	43.55
cys	74.281	111.8	113.92	98.84	101.21	99.952	91.408	93.087	113.62	91.48	87.934	51.812
Asn	76.585	110.6	112.81	126.55	101.29	72.158	74.064	92.13	119.55	89.445	27.341	33.228
Lys	70.288	112.88	116.83	96.867	89.629	113.5	88.163	119.15	142.53	84.367	50.21	29.808
Gln	78.586	113.86	107.56	109.72	91.049	99.23	95.54	108.92	137.5	85.657	61.288	38.423
His	49.876	132.41	117.71	150.69	97.13	52.181	67.803	121.63	169.86	34.333	22.188	10.986
Tyr	86.831	106.5	106.67	103.15	95.154	101.69	99.057	107.03	116.5	96.419	76.763	57.181
