# Supplementary material for: SLC1A5 provides glutamine and asparagine necessary for bone development in mice
Source: eLife journal article supplement (doi:10.7554/elife.71595), 2021-10-14
Supplement: fig6-figsupp1-data1 [file Figure 6 figure supplement 1 A.xlsx]

## Sheet: Sheet1
	13CU-Gln			13CU-Asn
Fum M+4	15.7901	16.0319	17.0697	6.89665	7.03465	7.3141
Mal M+4	17.649	17.4493	18.7768	7.49334	7.41417	7.81471
Suc M+4	24.1201	23.978	22.9991	0.211827	0.285111	0.296683
Cit M+4	14.0041	13.902	14.8298	5.07216	5.32503	5.52361
Cit M+5	5.561	5.5674	5.48901	0.889803	0.781692	0.89322
