# Supplementary material for: SLC1A5 provides glutamine and asparagine necessary for bone development in mice
Source: eLife journal article supplement (doi:10.7554/elife.71595), 2021-10-14
Supplement: fig6-figsupp1-data1 [file Figure 6 Figure supplement 1B.xlsx]

## Sheet: Sheet1
	DMSO			BPTES
aKG M+5	35.384	39.98	33.34	10.8	7.01	6.55
Fum M+4	9.16876	12.2427	6.28264	1.69251	-0.688039	1.38556
Mal M+4	19.8815	20.0708	18.9707	3.63251	3.25819	3.10985
Suc M+4	19.3912	12.9651	11.5916	3.09446	2.67886	2.0211
Cit M+4	19.455	18.162	18.8677	4.16321	4.1313	3.25028
Cit M+5	7.91782	7.9588	8.07609	1.66231	1.48351	1.33399
