# Supplementary material for: SLC1A5 provides glutamine and asparagine necessary for bone development in mice
Source: eLife journal article supplement (doi:10.7554/elife.71595), 2021-10-14
Supplement: fig6-figsupp1-data1 [file Figure 6 figure supplement 1C.xlsx]

## Sheet: Sheet1
	DMSO			BPTES
%Edu +ve cells	31.9	31.6	28.6	9.53	12.7	11
