# Supplementary material for: SLC1A5 provides glutamine and asparagine necessary for bone development in mice
Source: eLife journal article supplement (doi:10.7554/elife.71595), 2021-10-14
Supplement: fig6-figsupp1-data1 [file Figure 6 figure supplement 1D.xlsx]

## Sheet: Sheet1
	DMSO			Avergae	STD		BPTES			Average	STD
AGG	1.14939	0.974384	0.876225	1	0.138372		0.221305	0.288538	0.168392	0.226078	0.0602152
CGG	0.728123	0.898143	1.37373	1	0.334641		0.346231	0.508767	0.222983	0.359327	0.143341
CTG	0.191018	0.804533	2.00445	1	0.922382		1.02828	0.93707	1.38304	1.11613	0.235605
TTG	0.525792	1.31641	1.15779	1	0.418264		1.01759	0.486307	1.01823	0.840709	0.306921
TTC	1.05143	0.868784	1.07979	1	0.114518		0.63452	0.363395	0.364211	0.454042	0.156299
GTT	0.91708	0.69424	1.38868	1	0.354567		0.344564	0.15826	0.455663	0.319495	0.150278
TAC	1.58672	0.541493	0.871792	1	0.534275		0.119541	1.43746	0.952768	0.83659	0.666597
