# Supplementary figures and images for: SLC1A5 provides glutamine and asparagine necessary for bone development in mice
Source: eLife journal article supplement (doi:10.7554/elife.71595), 2021-10-14

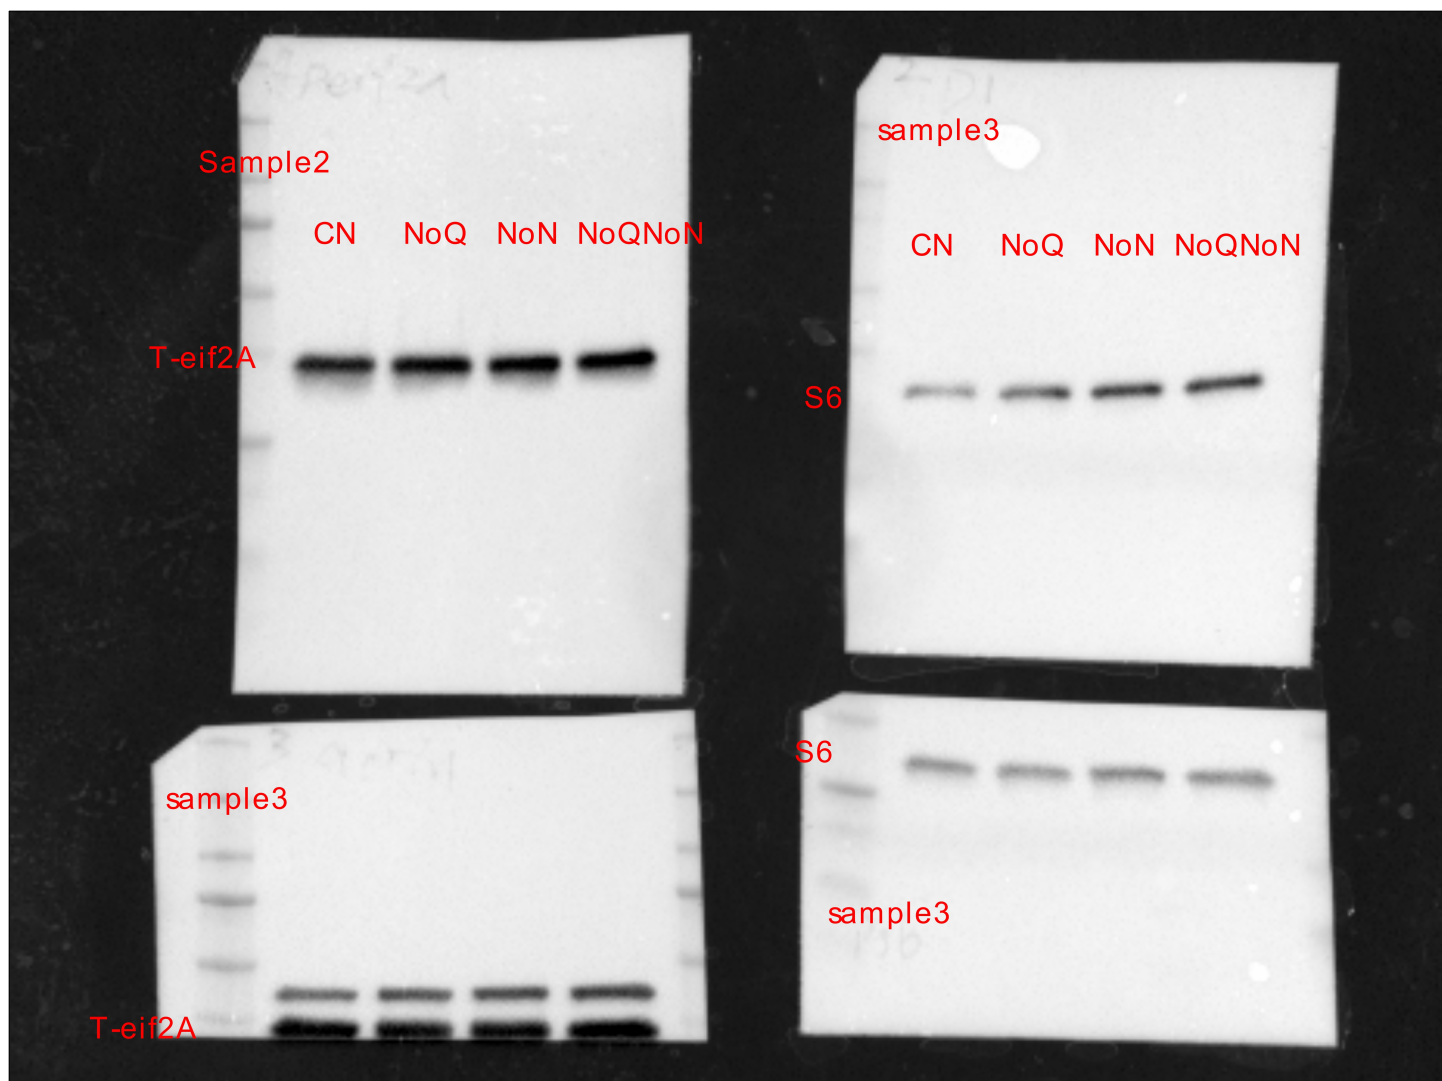

Supplement: fig5-data1 [file elife-71595-fig5-data1-v2.zip]

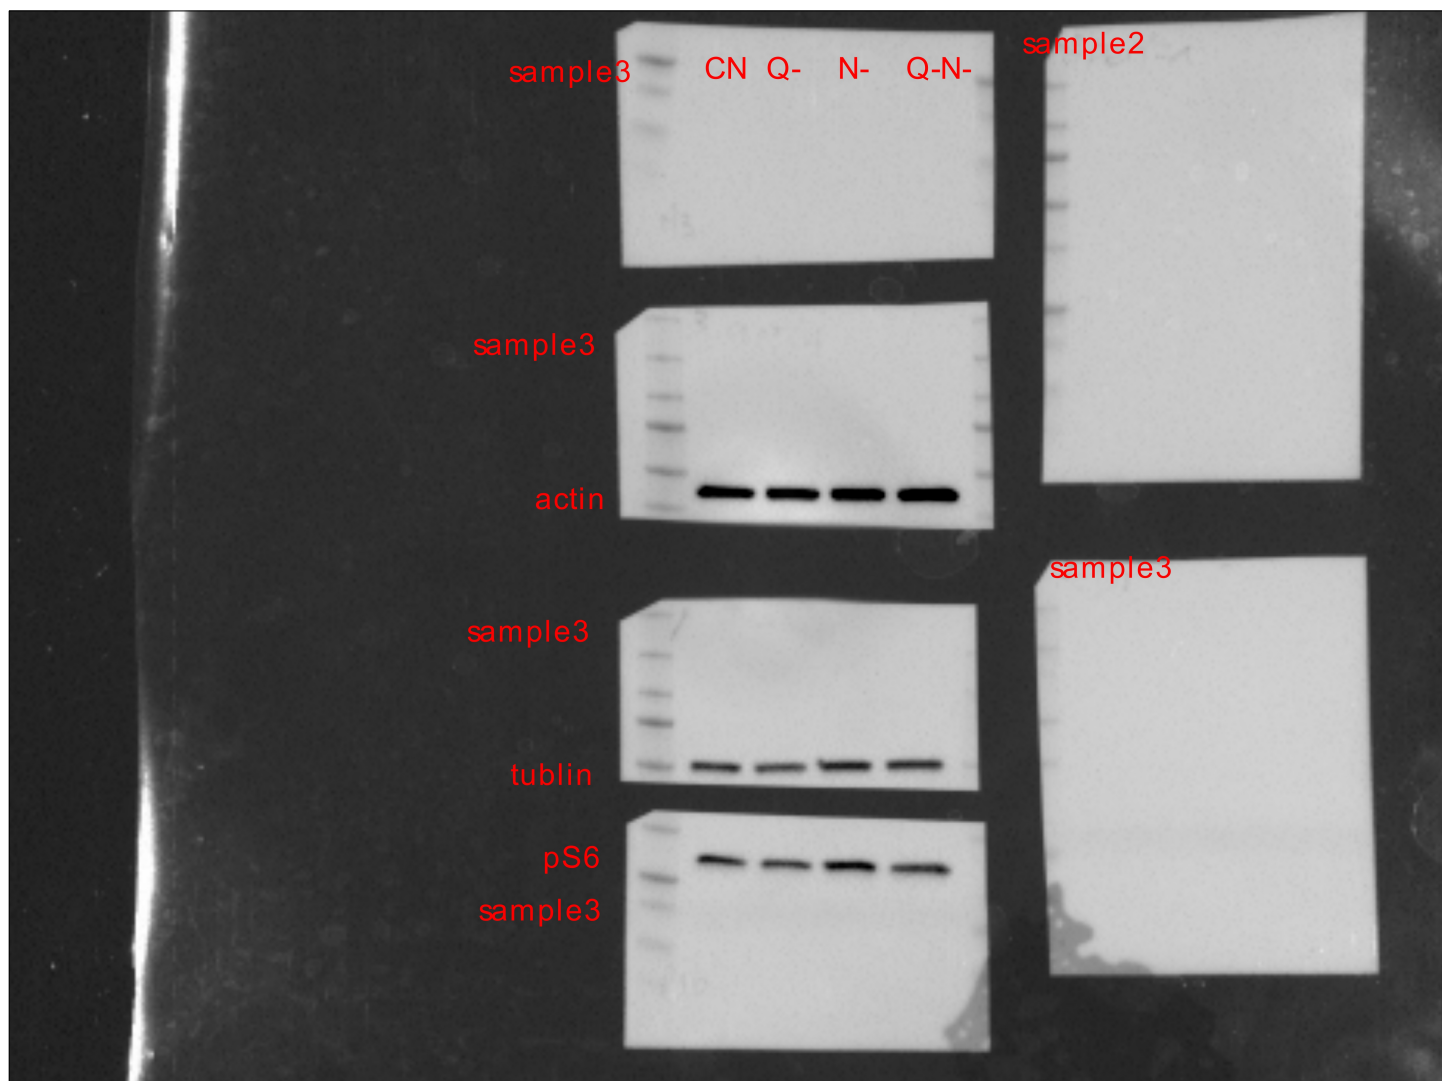

Supplement: fig5-data1 [file elife-71595-fig5-data1-v2.zip]

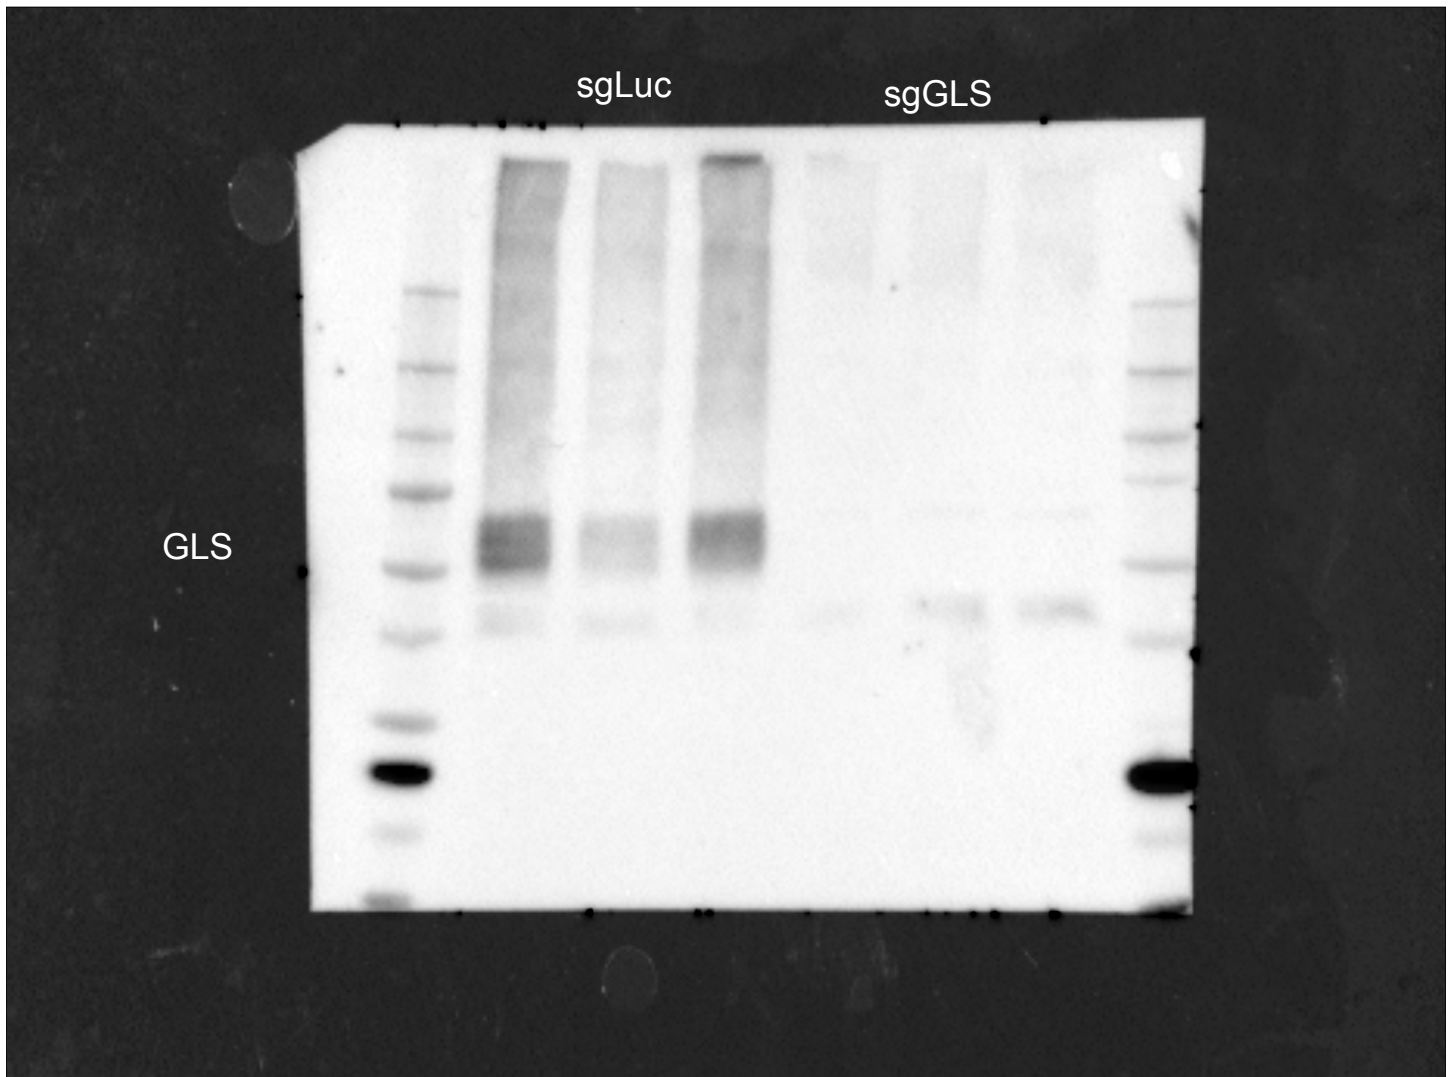

Supplement: fig6-figsupp1-data1 [file Sharma Figure 6 figure supplement 1 Source Data GLS Blot.pdf › Figure 6 figure supplement 1 Source Data/Sharma Figure 6 figure supplement 1 Source Data/Sharma Figure 6 figure supplement 1 Source Data GLS Blot.pdf]

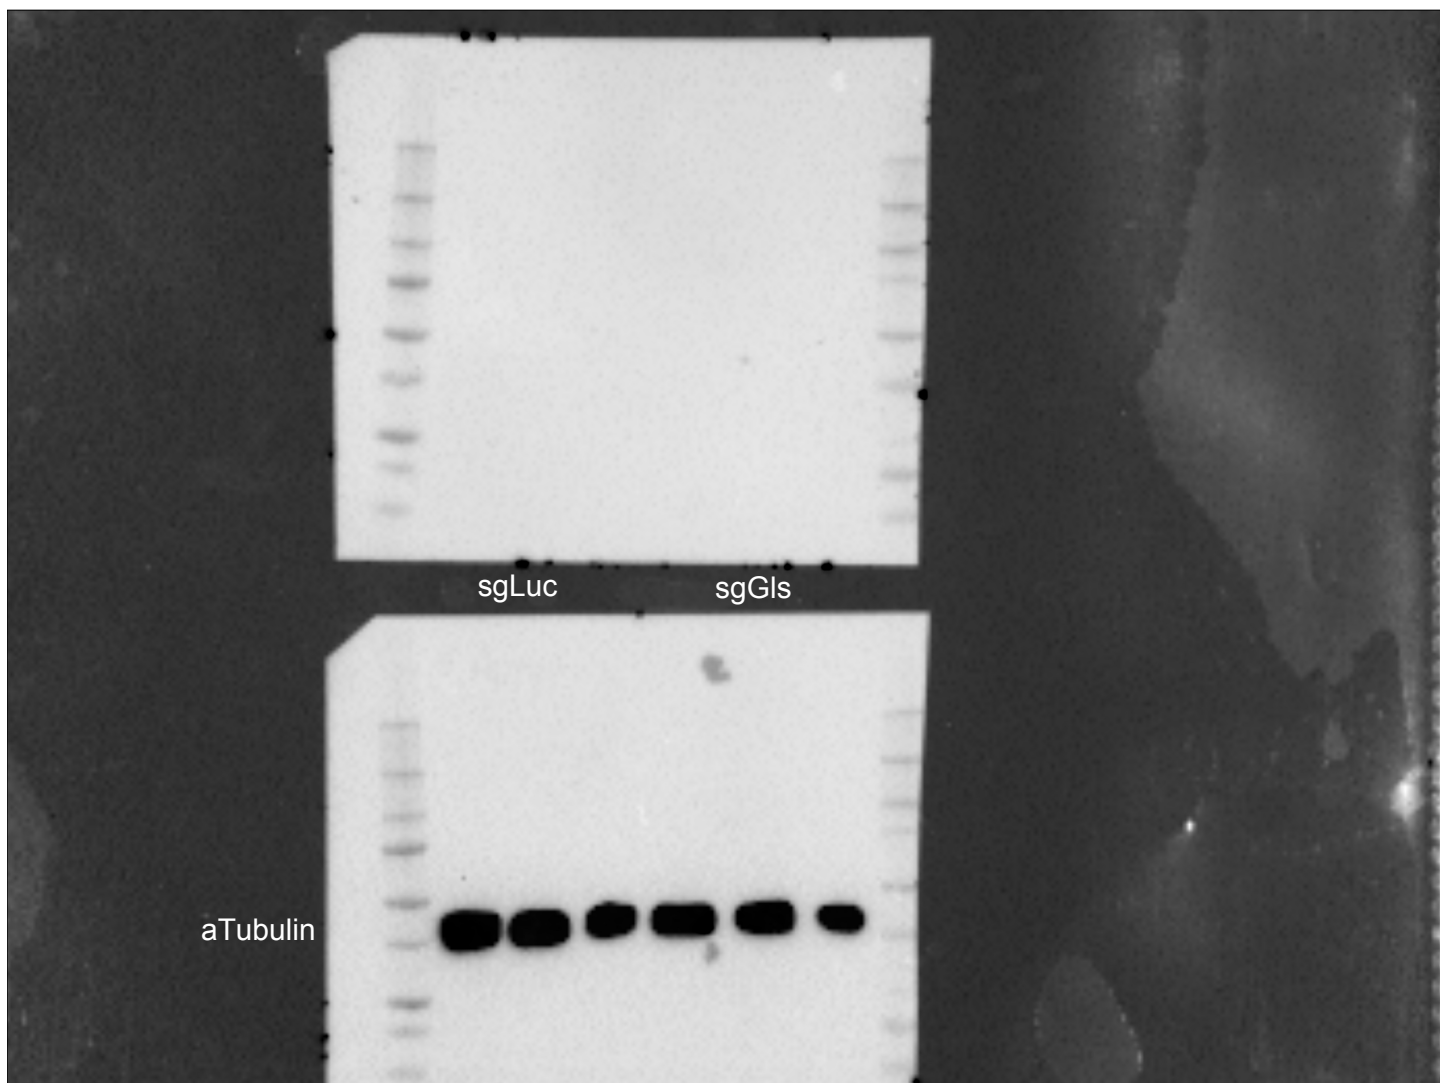

Supplement: fig6-figsupp1-data1 [file Sharma Figure 6 figure supplement 1 Source Data aTub.pdf › Figure 6 figure supplement 1 Source Data/Sharma Figure 6 figure supplement 1 Source Data/Sharma Figure 6 figure supplement 1 Source Data aTub.pdf]
